# Supplementary material
Source: PubMed Central journal article supplement (PMC554794)
Supplement: pnas_102_11_3994__2.pdf [file pnas_102_11_3994__2.pdf]

**Table 1.** Acquisition parameters for NMR experiments performed on apo and Cu(I)DR1885

| Experiments                                                    | Dimensions of acquired data |                       |                       | Spectral width<br>(ppm) |    |    | NS | Carrier<br>(ppm)  |
|----------------------------------------------------------------|-----------------------------|-----------------------|-----------------------|-------------------------|----|----|----|-------------------|
|                                                                | t1                          | t2                    | t3                    | F1                      | F2 | F3 |    |                   |
| [ <sup>1</sup> H- <sup>1</sup> H]-NOESY                        | 1024( <sup>1</sup> H)       | 2048( <sup>1</sup> H) |                       | 15                      | 15 |    | 64 | 4.75 / 4.75       |
| [ <sup>1</sup> H- <sup>1</sup> H]-TOCSY                        | 1024( <sup>1</sup> H)       | 2048( <sup>1</sup> H) |                       | 15                      | 15 |    | 64 | 4.75 / 4.75       |
| <sup>1</sup> H- <sup>15</sup> N-HSQC                           | 512( <sup>15</sup> N)       | 1024( <sup>1</sup> H) |                       | 15                      | 36 |    | 4  | 119 / 4.75        |
| CBCA(CO)NH                                                     | 126( <sup>13</sup> C)       | 48( <sup>15</sup> N)  | 1024( <sup>1</sup> H) | 88                      | 40 | 16 | 16 | 43 / 119 / 4.75   |
| CBCANH                                                         | 126( <sup>13</sup> C)       | 48( <sup>15</sup> N)  | 1024( <sup>1</sup> H) | 88                      | 40 | 16 | 16 | 43 / 119 / 4.75   |
| HNCO                                                           | 128( <sup>13</sup> C)       | 48( <sup>15</sup> N)  | 2048( <sup>1</sup> H) | 16                      | 40 | 16 | 4  | 173 / 119 / 4.75  |
| HN(CA)CO                                                       | 88( <sup>13</sup> C)        | 48( <sup>15</sup> N)  | 2048( <sup>1</sup> H) | 16                      | 40 | 16 | 16 | 173 / 119 / 4.75  |
| <sup>13</sup> C(H)CCH-TOCSY                                    | 256( <sup>13</sup> C)       | 94( <sup>13</sup> C)  | 1024( <sup>1</sup> H) | 88                      | 88 | 16 | 16 | 43 / 43 / 4.75    |
| CC(CO)NH-TOCSY                                                 | 128( <sup>13</sup> C)       | 52( <sup>15</sup> N)  | 1024( <sup>1</sup> H) | 88                      | 40 | 16 | 16 | 43 / 119 / 4.75   |
| <sup>15</sup> N-edited [ <sup>1</sup> H- <sup>1</sup> H]-NOESY | 256( <sup>1</sup> H)        | 48( <sup>15</sup> N)  | 1024( <sup>1</sup> H) | 14                      | 36 | 14 | 8  | 4.75 / 119 / 4.75 |
| <sup>13</sup> C-edited [ <sup>1</sup> H- <sup>1</sup> H]-NOESY | 288( <sup>1</sup> H)        | 88( <sup>13</sup> C)  | 1024( <sup>1</sup> H) | 13                      | 86 | 13 | 8  | 4.75 / 43 / 4.75  |
| HNHA                                                           | 114( <sup>1</sup> H)        | 38( <sup>15</sup> N)  | 1024( <sup>1</sup> H) | 15                      | 36 | 15 | 16 | 4.75 / 119 / 4.75 |
| HNHB                                                           | 122( <sup>1</sup> H)        | 40( <sup>15</sup> N)  | 1024( <sup>1</sup> H) | 15                      | 36 | 15 | 24 | 4.75 / 119 / 4.75 |
| <sup>2</sup> J <sup>1</sup> H- <sup>15</sup> N-HSQC            | 256( <sup>15</sup> N)       | 2048( <sup>1</sup> H) |                       | 205                     | 25 |    | 32 | 130 / 4.75        |
