# Supplementary material
Source: PubMed Central journal article supplement (PMC554794)
Supplement: pnas_102_11_3994__8.pdf [file pnas_102_11_3994__8.pdf]

**Table 3.**  $^1\text{H}$ ,  $^{15}\text{N}$  and  $^{13}\text{C}$  resonance assignments for *D. radiodurans* apoDR1885 at 298 K, in 100 mM potassium phosphate buffer (pH 7), are listed in ppm, and  $^{15}\text{N}$  and HN resonance assignments are also reported at pH 5

| Res | N (HN) pH 5.0 | N(HN) pH 7.0  | CA(HA/QA/HA1/HA2)    | CO    | CB(HB/QB/HB2/HB3)    | Others                                                                |
|-----|---------------|---------------|----------------------|-------|----------------------|-----------------------------------------------------------------------|
| A21 | 125,7 (8,289) | 125,5 (8,305) | 50,04                |       | 16,34                |                                                                       |
| G22 | 108,6 (8,288) | 108,4 (8,302) | 42,44                | 171,4 |                      |                                                                       |
| A23 | 123,7 (8,059) | 123,5 (8,039) | 49,99 (4,228)        |       | 16,70 (1,254)        |                                                                       |
| Q24 | 119,4 (8,289) | 119,4 (8,317) | 52,70                |       | 26,96                |                                                                       |
| A25 | 123,9 (7,961) | 123,7 (7,965) | 48,69 (4,761)        |       | 17,40                |                                                                       |
| L26 | 121,7 (8,316) | 121,6 (8,320) | 49,67 (4,196)        |       | 40,58                | (QD1 0,557); CD2 26,41 (QD2 0,708)                                    |
| P27 |               |               | 59,24 (4,778)        | 170,5 | 25,15 (2,248)        | CD 48,74 (HD2 3,259; HD3 3,687); CG 25,04 (QG 1,760)                  |
| V28 | 121,7 (7,731) | 121,6 (7,732) | 56,28 (5,120)        | 172,6 | 34,19 (1,497)        | CG1 20,75 (QG1 0,651); CG2 21,51 (QG2 0,564)                          |
| T29 | 119,6 (8,958) | 119,5 (8,965) | 57,69 (4,575)        | 170,8 | 67,70 (4,093)        | CG2 19,39 (QG2 1,074)                                                 |
| V30 | 124,0 (8,721) | 124,0 (8,733) | 57,82 (4,896)        | 172,2 | 31,69 (1,891)        | CG1 19,84 (QG1 0,878); CG2 18,66 (QG2 1,000)                          |
| Q31 | 125,4 (8,725) | 125,3 (8,725) | 51,81 (4,741)        | 173,2 | 30,52 (1,794; 1,993) | NE2 112 (7,377; 6,744); CG 30,65 (QG 2,245)                           |
| G32 | 110,7 (8,782) | 110,7 (8,826) | 44,72 (3,829; 3,730) | 173,3 |                      |                                                                       |
| A33 | 123,4 (8,610) | 123,3 (8,634) | 49,76 (5,087)        | 175,6 | 15,89 (1,171)        |                                                                       |
| T34 | 121,2 (9,316) | 121,0 (9,334) | 58,24 (5,272)        | 169,7 | 70,90 (3,937)        | CG2 18,86 (QG2 1,096)                                                 |
| V35 | 123,7 (8,099) | 123,4 (8,060) | 57,56 (4,385)        | 172,2 | 32,25 (1,428)        | CG1 20,00 (QG1 0,610); CG2 19,78                                      |
| A36 | 129,3 (7,963) | 129,2 (8,011) | 49,62 (4,414)        | 174,8 | 15,59 (1,316)        |                                                                       |
| A37 | 127,5 (8,081) | 127,2 (8,064) | 50,44 (3,843)        | 174,2 | 16,24 (1,029)        |                                                                       |
| V38 | 113,8 (7,176) | 113,6 (7,181) | 55,20 (4,759)        | 171,1 | 31,00 (2,110)        | (QG1 0,959); CG2 14,86 (QG2 0,636)                                    |
| P39 |               |               | 62,45 (4,246)        | 174,8 | 30,10 (1,883; 2,185) | CD 47,91 (HD2 3,502; HD3 3,754); CG 24,68 (QG 1,956)                  |
| P40 |               |               | 59,29 (4,184)        | 171,4 | 60,37 (2,805; 2,182) | (QG 1,982)                                                            |
| S41 | 109,3 (7,531) | 109,2 (7,545) | 56,58 (4,144)        | 172,9 | 47,28 (3,726; 3,916) |                                                                       |
| I42 | 125,8 (7,833) | 125,7 (7,828) | 56,95 (4,174)        | 171,2 | 34,39 (1,974)        | (QD1 0,709); CG1 24,37 (HG12 1,369; HG13 1,249) CG2 15,13 (QG2 1,085) |
| R43 | 123,0 (8,464) | 122,8 (8,483) | 53,05 (4,230)        | 171,2 | 27,87 (1,987; 1,633) | CD 40,13 (QD 3,046); CG 24,39 (QG 1,609)                              |
| D44 | 116,5 (6,954) | 116,4 (6,947) | 49,36 (5,707)        | 172,7 | 42,56 (2,406; 2,591) |                                                                       |
| T45 | 113,0 (8,167) | 113,1 (8,151) | 56,33 (4,400)        | 167,5 | 66,12 (4,009)        | CG2 17,32 (QG2 0,994)                                                 |
| A46 | 126,3 (7,992) | 126,4 (7,993) | 48,14 (5,153)        | 171,8 | 21,71 (1,013)        |                                                                       |
| A47 | 118,8 (8,426) | 119,2 (8,627) | 47,06 (4,907)        | 171,8 | 19,78 (0,776)        |                                                                       |
| Y48 | 119,8 (8,494) | 119,1 (8,453) | 51,64 (4,776)        | 171,7 | 39,00 (2,981; 3,433) | (QD 6,642); (QE 6,113)                                                |
| M49 | 113,0 (8,116) | 113,0 (8,185) | 54,20 (4,614)        | 170,6 | 30,14 (2,786; 1,665) | CG 27,07 (QG 2,191)                                                   |
| T50 | 116,6 (8,880) | 116,4 (8,860) | 60,20 (4,908)        | 171,1 | 67,47 (3,864)        | CG2 18,88 (QG2 1,002)                                                 |
| L51 | 128,1 (9,040) | 128,1 (9,038) | 50,54 (5,125)        | 172,5 | 41,62 (1,921; 1,099) | CG 23,69                                                              |

| Res | N (HN) pH 5.0 | N(HN) pH 7.0  | CA(HA/QA/HA1/HA2)    | CO    | CB(HB/QB/HB2/HB3)    | Others                                                            |
|-----|---------------|---------------|----------------------|-------|----------------------|-------------------------------------------------------------------|
| T52 | 119,5 (8,873) | 119,4 (8,882) | 59,30 (4,923)        | 170,2 | 67,42 (3,848)        | CG2 19,13 (QG2 0,833)                                             |
| N53 | 126,0 (9,188) | 125,8 (9,195) | 49,45 (4,620)        | 172,6 | 36,70 (3,471; 2,491) | ND2 112 (7,669; 6,435)                                            |
| K54 | 125,9 (8,900) | 125,9 (8,907) | 52,98 (4,257)        | 173,5 | 28,39 (1,867)        | CG 21,54                                                          |
| S55 | 117,4 (8,492) | 117,2 (8,504) | 54,44 (4,761)        | 169,5 | 64,74 (4,128; 3,833) |                                                                   |
| D56 | 116,3 (8,260) | 116,2 (8,266) | 51,44 (4,496)        | 172,0 | 38,22 (2,703; 2,589) |                                                                   |
| Q57 | 117,8 (7,592) | 117,6 (7,589) | 49,66 (4,804)        | 170,1 | 28,09 (1,683; 1,936) | NE2 112,8 (7,359; 6,739); CG 30,45 (HG2 2,220; HG3 2,258)         |
| P58 |               |               | 59,74 (4,205)        | 173,9 | 29,68 (1,537; 2,068) | CD 48,44 (QD 3,620); CG 24,70 (QG 1,923)                          |
| I59 | 123,2 (8,261) | 123,1 (8,275) | 57,26 (3,997)        | 171,1 | 39,19 (1,333)        | CG1 24,39; CG2 14,93 (QG2 0,651)                                  |
| K60 | 129,4 (8,954) | 129,4 (8,975) | 52,47 (4,744)        | 172,6 | 30,79 (1,393; 1,18)  | CG 22,22                                                          |
| L61 | 125,1 (9,223) | 125,1 (9,223) | 51,19 (4,627)        | 173,8 | 40,68 (1,846; 1,073) | CD1 19,86; CD2 20,02 (QD2 0,496); CG 23,06 (HG 0,642)             |
| V62 | 112,3 (8,857) | 112,0 (8,864) | 57,92 (4,835)        | 173,5 | 31,31 (2,364)        | CG1 19,20 (QG1 0,893); CG2 15,69 (QG2 0,658)                      |
| G63 | 107,7 (7,543) | 107,6 (7,531) | 42,51 (3,911; 4,181) | 167,4 |                      |                                                                   |
| A64 | 121,2 (8,561) | 121,0 (8,556) | 47,23 (5,277)        | 172,2 | 20,05 (0,831)        |                                                                   |
| A65 | 121,0 (8,611) | 120,9 (8,593) | 48,54 (4,611)        | 173,1 | 20,19 (1,232)        |                                                                   |
| T66 | 117,5 (8,482) | 117,4 (8,557) | 55,74 (4,987)        |       | - (4,643)            | CG2 17,03 (QG2 0,887)                                             |
| P67 |               |               | 61,15 (4,455)        | 174,9 | 29,38 (2,293; 1,859) | CD 49,04 (HD2 3,719; HD3 3,883); CG 24,35 (QG 1,924)              |
| L68 | 117,1 (7,618) | 116,9 (7,610) | 52,20 (4,108)        | 172,9 | 40,10 (1,481; 1,404) | CD1 20,81 (QD1 0,687); CD2 22,14 (QD2 0,749); CG 24,72 (HG 1,535) |
| A69 | 118,9 (7,471) | 119,0 (7,490) | 47,50 (4,873)        | 172,6 | 18,97 (0,889)        |                                                                   |
| T70 | 118,0 (8,420) | 117,7 (8,417) | 63,18 (3,981)        | 173,6 | 66,47 (4,200)        | CG2 19,12 (QG2 1,200)                                             |
| S71 | 113,7 (8,159) | 113,6 (8,175) | 52,09 (4,989)        | 168,5 | 61,56 (3,728; 3,471) |                                                                   |
| M73 | 121,9 (9,122) | 122,1 (9,144) | 51,91 (4,750)        | 171,8 | 34,94 (1,973; 1,751) | CG 28,79 (QG 2,417)                                               |
| L74 | 122,5 (8,795) | 122,3 (8,705) | 51,89 (4,351)        | 172,6 | 37,85 (1,933; 0,779) | CG 23,99 (HG 1,491)                                               |
| M75 | 119,7 (8,185) | 120,5 (8,290) | 50,70 (5,130)        | 171,5 | 35,23 (1,469; 0,706) | CG 30,49 (QG 2,099)                                               |
| T76 | 113,5 (8,657) | 112,8 (8,614) | 57,56 (4,949)        | 170,8 | 67,81 (3,832)        | CG2 16,77 (QG2 0,866)                                             |
| T77 | 120,2 (7,523) | 119,1 (7,508) | 59,26 (4,864)        | 171,7 | 67,45 (3,818)        | CG2 18,95 (QG2 0,987)                                             |
| T78 | 118,2 (8,414) | 118,3 (8,481) | 57,34 (4,398)        | 171,2 | 67,51 (4,071)        | CG2 18,84 (QG2 0,902)                                             |
| H79 | 118,6 (8,602) | 119,0 (8,520) | 52,89 (4,942)        | 172,0 | 27,33 (3,168; 2,889) | (HD2 6,92) (NE2 177,57) (HE1 7,98) (ND1 205,09)                   |
| S80 | 117,3 (8,146) | 117,3 (8,167) | 55,46 (4,444)        | 173,1 | 60,90 (3,714)        |                                                                   |
| G81 | 115,0 (8,958) | 115,6 (8,910) | 43,58 (3,794; 3,860) | 172,5 |                      |                                                                   |
| G82 | 108,2 (8,438) | 107,8 (8,442) | 42,60 (3,982; 3,717) | 171,4 |                      |                                                                   |
| M83 | 120,0 (7,756) | 119,8 (7,724) | 51,84 (4,535)        | 172,6 | 31,24 (1,945)        | CG 29,21 (QG 2,435)                                               |
| A84 | 126,7 (8,446) | 126,6 (8,429) | 49,00 (4,570)        | 175,0 | 16,89 (1,226)        |                                                                   |

| Res         | N (HN) pH 5.0 | N(HN) pH 7.0  | CA(HA/QA/HA1/HA2)    | CO    | CB(HB/QB/HB2/HB3)    | Others                                                                                   |
|-------------|---------------|---------------|----------------------|-------|----------------------|------------------------------------------------------------------------------------------|
| <b>G85</b>  | 110,2 (8,041) | 110,2 (8,142) | 42,01 (4,196; 3,579) | 170,6 |                      |                                                                                          |
| <b>M86</b>  | 119,0 (8,304) | 119,3 (8,308) | 52,15 (5,262)        | 172,4 | 33,06 (1,961; 1,853) | CG 29,38 (QG 2,481)                                                                      |
| <b>K87</b>  | 121,1 (8,529) | 121,5 (8,596) | 51,97 (4,530)        | 171,7 | 33,44 (1,534)        | CE 39,39 (QE 2,722); CG 21,15 (QG 1,123)                                                 |
| <b>M88</b>  | 124,8 (8,548) | 124,7 (8,455) | 53,74 (4,723)        |       | 30,21 (1,879)        | CG 29,42 (HG2 2,582; HG3 2,438)                                                          |
| <b>V89</b>  | 118,1 (7,782) | 118,0 (7,837) | 54,40 (4,596)        |       | 30,48 (1,761)        | CG2 15,74 (QG2 0,350)                                                                    |
| <b>P90</b>  |               |               | 60,96 (4,18)         | 173,7 | 28,49 (1,491; 1,893) | CD 47,43 (HD2 3,287; HD3 3,331); CG 23,93 (QG 1,477)                                     |
| <b>W91</b>  | 110,4 (6,463) | 110,3 (6,450) | 52,93 (5,217)        | 172,0 | 27,59 (3,474; 2,749) | (HD1 6,749); NE1 130,0 (HE1 10,01)<br>(HE3 7,225); (HH2 7,103); (HZ2 7,384); (HZ3 7,022) |
| <b>L92</b>  | 117,6 (8,557) | 117,3 (8,524) | 50,93 (4,741)        | 173,2 | 44,22 (1,345)        | CG 24,14 (HG 0,689)                                                                      |
| <b>T93</b>  | 119,5 (8,874) | 119,4 (8,882) | 59,35 (5,015)        | 171,3 | 67,27 (3,858)        | CG2 19,20                                                                                |
| <b>I94</b>  | 127,3 (9,607) | 127,1 (9,621) | 55,45 (4,532)        | 171,6 | 35,87 (1,792)        | CG2 17,56 (QG2 0,856)                                                                    |
| <b>P95</b>  |               |               | 59,86 (4,099)        | 174,3 | 30,17 (1,633; 2,310) | CD 49,07 (HD2 3,249; HD3 3,988); (QG 1,914)                                              |
| <b>A96</b>  | 124,8 (8,512) | 124,5 (8,523) | 50,77 (3,493)        | 174,8 | 15,92 (0,996)        |                                                                                          |
| <b>R97</b>  | 118,1 (8,054) | 118,0 (8,050) | 54,29 (4,022)        | 173,0 | 25,14 (1,863; 1,785) | CD 40,39 (QD 2,943); CG 22,69 (QG 1,366)                                                 |
| <b>G98</b>  | 106,7 (7,594) | 106,5 (7,583) | 42,14 (4,675; 3,441) | 169,6 |                      |                                                                                          |
| <b>T99</b>  | 112,6 (8,255) | 112,6 (8,279) | 58,17 (5,397)        | 171,0 | 69,99 (3,680)        | CG2 19,16 (QG2 0,958)                                                                    |
| <b>L100</b> | 127,0 (9,217) | 127,1 (9,237) | 51,35 (4,727)        | 171,6 | 43,83 (1,735; 1,472) | CG 25 (HG 1,527)                                                                         |
| <b>T101</b> | 126,0 (9,098) | 125,9 (9,099) | 60,10 (4,507)        | 170,5 | 66,48 (3,921)        | CG2 19,01 (QG2 0,985)                                                                    |
| <b>L102</b> | 128,7 (9,122) | 129,0 (9,136) | 51,32 (5,173)        | 174,0 | 38,54 (2,309; 1,773) | CD1 22,23; CD2 21,88 (QD2 0,731); CG 25,00 (HG 1,562)                                    |
| <b>Q103</b> | 120,6 (9,001) | 120,8 (9,116) | 51,51 (4,336)        | 171,8 | 28,51 (1,788; 1,907) | NE2 112,3 (7,431; 6,782); (QG 2,211)                                                     |
| <b>R104</b> | 121,8 (7,803) | 121,2 (7,648) | 56,22 (3,300)        | 174,1 | 27,04 (1,254; 1,205) | CD 40,67 (HD2 2,942; HD3 2,882); CG 23,70 (QG 1,266)                                     |
| <b>D105</b> | 119,0 (8,511) | 119,0 (8,506) | 51,80 (4,532)        | 172,4 | 37,59 (2,544; 2,777) |                                                                                          |
| <b>G106</b> | 108,2 (7,478) | 108,5 (7,600) | 42,41 (4,645; 3,748) | 172,6 |                      |                                                                                          |
| <b>D107</b> | 131,5 (9,456) | 130,8 (9,343) | 52,17 (5,246)        | 173,1 | 39,27 (2,594)        |                                                                                          |
| <b>H108</b> | 112,4 (9,152) | 113,6 (9,091) | 53,93 (4,780)        | 169,1 | 26,21 (3,777; 3,066) | (HD2 6,89) (NE2 181,44) (HE1 7,82) (ND1 212,30)                                          |
| <b>V109</b> | 118,0 (7,419) | 116,8 (7,414) | 58,05 (4,385)        | 173,0 | 30,53 (1,769)        | CG1 18,35; CG2 18,43 (QG2 0,482)                                                         |
| <b>M110</b> | 127,5 (9,401) | 127,1 (9,285) | 50,69 (5,080)        | 172,0 | 31,37 (1,601; 1,987) | CG 30,08 (QG 2,406)                                                                      |
| <b>L111</b> | 128,1 (9,482) | 128,1 (9,432) | 50,62 (3,910)        | 170,8 | 37,36 (0,728; 1,721) | CD1 21,22 (QD1 0,420); CD2 22,93 (QD2 0,503); CG 23,96                                   |
| <b>M112</b> | 120,4 (6,296) | 120,6 (6,291) | 51,39 (4,887)        | 174,2 | 29,27 (1,921; 2,175) | CG 29,66 (QG 2,456)                                                                      |
| <b>G113</b> | 115,4 (8,890) | 115,4 (8,887) | 44,79 (3,643; 3,820) | 173,7 |                      |                                                                                          |
| <b>L114</b> | 123,7 (9,458) | 123,6 (9,469) | 52,76 (4,381)        | 177,3 | 40,09 (1,452; 1,353) | (QD1 0,645); CG 24,19 (HG 1,579)                                                         |
| <b>K115</b> | 122,3 (8,605) | 122,2 (8,607) | 54,91 (3,877)        | 173,2 | 30,88 (1,879; 1,393) | CD 26,49; CE 39,53 (HE2 2,763; HE3 2,639); CG 23,27 (HG2 1,346; HG3 1,212)               |
| <b>R116</b> | 113,7 (7,618) | 113,5 (7,626) | 50,78 (4,601)        | 169,0 | 25,89 (1,480)        | CD 39,23 (QD 2,696)                                                                      |

| Res  | N (HN) pH 5.0 | N(HN) pH 7.0  | CA(HA/QA/HA1/HA2)     | CO    | CB(HB/QB/HB2/HB3)    | Others                                                        |
|------|---------------|---------------|-----------------------|-------|----------------------|---------------------------------------------------------------|
| P117 |               |               | 59,85 (4,366)         | 174,9 | 29,35 (2,193; 1,633) | CD 47,80 (QD 3,628); CG 24,59 (QG 1,855)                      |
| L118 | 123,7 (8,717) | 123,6 (8,727) | 50,88 (4,347)         | 174,4 | 41,06 (1,628; 1,202) | (QD1 0,617); CG 23,85 (HG 1,707)                              |
| K119 | 125,1 (9,551) | 125,0 (9,582) | 51,80 (4,421)         | 173,7 | 31,12 (1,464; 1,564) | CD 26,72; CE 41,77; CG 21,86 (QG 1,257)                       |
| V120 | 124,2 (8,456) | 124,1 (8,481) | 63,16 (3,165)         | 174,8 | 28,41 (1,826)        | CG1 20,16 (QG1 0,843); CG2 19,71                              |
| G121 | 115,9 (8,897) | 115,8 (8,890) | 42,11 (4,367); 3,485) | 171,9 |                      |                                                               |
| E122 | 121,1 (7,973) | 121,0 (7,977) | 53,49 (4,494)         | 171,6 | 28,20 (1,804; 2,300) | CG 33,63 (QG 2,716)                                           |
| T123 | 117,3 (8,500) | 117,1 (8,511) | 59,33 (4,824)         | 171,8 | 67,20                |                                                               |
| V124 | 128,4 (9,298) | 128,3 (9,311) | 57,81 (4,338)         | 171,4 | 31,06 (1,689)        | CG2 18,11 (QG2 0,562)                                         |
| N125 | 125,2 (8,533) | 125,0 (8,512) | 50,65 (5,350)         | 172,7 | 36,78 (2,445; 2,618) | ND2 112,5 (6,634; 7,307)                                      |
| I126 | 128,1 (9,454) | 128,1 (9,460) | 57,50 (4,396)         | 171,8 | 39,03 (1,419)        | CD1 11,47 (QD1 0,357); CG2 14,28 (QG2 0,529)                  |
| T127 | 124,6 (9,363) | 124,5 (9,383) | 59,32 (5,045)         | 172,4 | 67,28 (3,811)        | CG2 19,02 (QG2 1,017)                                         |
| L128 | 128,4 (9,303) | 128,3 (9,302) | 50,74 (4,979)         | 172,5 | 41,17 (1,657; 1,239) | CG 24 (HG 1,548)                                              |
| K129 | 120,9 (8,165) | 120,8 (8,183) | 52,28 (4,774)         | 172,5 | 32,99 (1,475; 1,409) | CD 26,82 (QD 1,414); CE 39,07 (QE 2,692); CG 21,87 (QG 1,028) |
| A130 | 126,1 (8,608) | 125,9 (8,604) | 47,95 (5,529)         | 177,6 | 20,06 (1,467)        |                                                               |
| T131 | 112,5 (8,231) | 112,4 (8,255) | 61,69 (3,847)         | 171,9 | 66,13 (4,072)        | CG2 20,61 (QG2 1,141)                                         |
| D132 | 116,6 (7,122) | 116,4 (7,101) | 50,44 (4,494)         | 174,3 | 38,24 (3,022; 2,441) |                                                               |
| G133 | 107,5 (7,816) | 107,4 (7,819) | 42,37 (4,271; 3,409)  | 172,0 |                      |                                                               |
| R134 | 120,3 (7,729) | 120,3 (7,744) | 54,79 (4,395)         | 173,4 | 29,64 (1,410)        | (QD 1,964); CG 24,58 (QG 1,510)                               |
| T135 | 107,5 (8,105) | 107,3 (8,110) | 56,60 (5,401)         | 171,6 | 70,83 (3,954)        | CG2 18,92 (QG2 0,982)                                         |
| L136 | 120,5 (8,573) | 120,3 (8,579) | 51,09 (4,686)         | 171,9 | 45,12 (1,524; 1,295) | CD1 21,12 (QD1 0,938); CG 24,21 (HG 0,546)                    |
| N137 | 126,2 (8,921) | 126,0 (8,931) | 50,75 (4,976)         | 171,4 | 36,76 (2,532; 2,461) | ND2 112,9 (7,405; 6,736)                                      |
| V138 | 126,5 (9,162) | 126,5 (9,178) | 59,03 (3,953)         | 171,1 | 31,41 (2,046)        | CG1 18,36 (QG1 0,760); CG2 18,44 (QG2 0,721)                  |
| A139 | 131,7 (8,477) | 131,6 (8,494) | 47,95 (4,539)         | 172,7 | 15,27 (1,116)        |                                                               |
| A140 | 128,4 (8,612) | 128,3 (8,605) | 47,58 (4,447)         | 173,1 | 18,97 (0,976)        |                                                               |
| T141 | 118,0 (7,671) | 118,0 (7,688) | 59,43 (4,828)         | 172,3 | 67,92 (3,751)        | CG2 19,05 (QG2 1,036)                                         |
| V142 | 127,9 (8,654) | 127,8 (8,645) | 59,82 (4,682)         | 173,9 | 28,05 (2,268)        | CG1 19,05 (QG1 0,576); CG2 20,52 (QG2 0,791)                  |
| K143 | 129,6 (8,763) | 129,6 (8,781) | 52,21 (4,706)         | 172,9 | 34,37 (1,769; 1,461) | CE 39,34; CG 22,24 (QG 1,326)                                 |
| K144 | 124,4 (8,827) | 124,3 (8,842) | 53,99 (4,240)         | 173,2 | 30,78 (1,714; 1,577) | CD 26,37 (QD 1,570); CE 39,32; CG 22,20 (QG 1,302)            |
| N145 | 121,9 (8,620) | 121,7 (8,629) | 50,52 (4,638)         | 172,5 | 36,39 (2,728; 2,656) | ND2 113 (7,583; 6,906)                                        |
| I146 | 122,1 (8,238) | 121,9 (8,260) | 58,59 (4,035)         | 173,6 | 35,86 (1,775)        | CD1 10,56 (QD1 0,746); CG1 19,68 (QG1 0,774); CG2 14,9        |
| E147 | 124,5 (8,437) | 124,4 (8,462) | 53,99 (4,158)         | 174,2 | 27,50 (1,942; 1,830) | CG 33,41 (QG 2,142)                                           |
| G148 | 110,3 (8,257) | 110,2 (8,282) | 42,69 (3,803)         | 170,6 |                      |                                                               |
| R149 | 125,5 (7,722) | 125,5 (7,736) | 54,50 (4,062)         | 178,4 | 28,64 (1,721; 1,576) | CD 40,44 (QD 3,050); CG 24,41 (QG 1,439)                      |
