# Supplementary material
Source: PubMed Central journal article supplement (PMC554794)
Supplement: pnas_102_11_3994__9.pdf [file pnas_102_11_3994__9.pdf]

**Table 4.**  $^1\text{H}$  and  $^{15}\text{N}$  resonance assignments for *D. radiodurans* Cu(I)DR1885 at 298 K, in 100 mM potassium phosphate buffer (pH 7), are listed in ppm

| Res | N     | HN    | HA/HA1/HA2/QA        | Others                                                                        |
|-----|-------|-------|----------------------|-------------------------------------------------------------------------------|
| Q24 | 119,8 | 8,350 | 4,222                | HB2 1,845; HB3 2,039; QG 2,274                                                |
| A25 | 123,8 | 7,938 | 4,746                | QB 1,343                                                                      |
| L26 | 121,5 | 8,290 | 4,182                | HB2 1,517; HB3 1,046; QD1 0,688; QD2 0,543; HG 0,912                          |
| P27 |       |       | 4,761                | QB 2,233; HD2 3,248; HD3 3,678; QG 1,751                                      |
| V28 | 121,5 | 7,711 | 5,105                | HB 1,478; QG1 0,637; QG2 0,550                                                |
| T29 | 119,5 | 8,919 | 4,569                | HB 4,078; QG2 1,060                                                           |
| V30 | 124,0 | 8,704 | 4,891                | HB 1,874; QG1 0,932; QG2 0,864                                                |
| Q31 | 125,3 | 8,658 | 4,737                | HB2 1,763; HB3 1,984; NE2 112,5; HE21 7,387; HE22 6,714; HG2 2,254; HG3 2,168 |
| G32 | 110,8 | 8,808 | HA1 3,822; HA2 3,721 |                                                                               |
| A33 | 123,3 | 8,577 | 5,110                | QB 1,158                                                                      |
| T34 | 120,8 | 9,326 | 5,281                | HB 3,952; QG2 1,096                                                           |
| V35 | 123,2 | 8,084 | 4,290                | HB 1,446; QG1 0,592; QG2 0,511                                                |
| A36 | 129,0 | 7,893 | 4,421                | QB 1,296                                                                      |
| A37 | 128,0 | 8,098 | 3,828                | QB 1,019                                                                      |
| V38 | 113,3 | 7,139 | 4,747                | HB 2,087; QG1 0,931; QG2 0,610                                                |
| P39 |       |       |                      | HD2 3,487; HG2 1,941; HG3 1,793                                               |
| P40 |       |       | 4,229                | HB2 2,182; HB3 1,937; HD2 3,652; HD3 2,402; HG2 1,867; HG3 2,012              |
| S41 | 109,0 | 7,508 | 4,100                | HB2 3,721; HB3 3,905                                                          |
| I42 | 125,8 | 7,825 | 4,162                | HB 1,959; QD1 0,697; HG12 1,362; HG13 1,230; QG2 1,066                        |
| R43 | 122,7 | 8,430 | 4,221                | HB2 1,961; HB3 1,622; QD 3,037; HG2 1,599; HG3 1,451                          |
| D44 | 115,8 | 6,922 | 5,698                | HB2 2,506; HB3 2,239                                                          |
| T45 | 112,8 | 8,230 | 4,404                | HB 4,055; HG1 7,035; QG2 1,008                                                |
| A46 | 125,8 | 8,408 | 5,135                | QB 1,014                                                                      |
| A47 | 119,5 | 8,716 | 4,864                | QB 0,752                                                                      |
| Y48 | 119,7 | 8,464 | 4,734                | HB2 2,519; HB3 3,452; QD 6,630; QE 6,209                                      |
| M49 | 113,0 | 8,205 | 4,609                | HB2 2,041; HB3 1,657; QG 2,772                                                |
| T50 | 116,3 | 8,882 | 4,881                | HB 3,857; QG2 0,993                                                           |
| L51 | 128,0 | 8,978 | 5,114                | HB2 1,919; HB3 1,081; QD1 0,637; HG 1,373                                     |
| T52 | 119,5 | 8,832 | 4,757                | HB 3,842; QG2 0,843                                                           |
| N53 | 125,7 | 9,161 | 4,609                | HB2 3,455; HB3 2,485; ND2 112,3; HD21 6,415; HD22 7,646                       |

| Res | N     | HN    | HA/HA1/HA2/QA        | Others                                                             |
|-----|-------|-------|----------------------|--------------------------------------------------------------------|
| K54 | 125,8 | 8,874 | 4,238                | HB2 1,554; HB3 1,858; HE2 2,747; HE3 2,844; QG 1,309               |
| S55 | 117,0 | 8,458 | 4,748                | HB2 4,105; HB3 3,819                                               |
| D56 | 116,2 | 8,229 | 4,479                | HB2 2,575; HB3 2,692                                               |
| Q57 | 117,5 | 7,560 | 4,795                | HB2 1,676; HB3 1,923; NE2 112,5; HE21 7,331; HE22 6,716; HG3 2,240 |
| P58 |       |       | 4,289                | HB2 1,531; HB3 2,061; QD 3,606; QG 1,907                           |
| I59 | 123,0 | 8,282 | 3,993                | HB 1,341; QD1 0,548; QG1 0,876; QG2 0,648                          |
| K60 | 129,8 | 8,950 | 4,673                | HB2 1,281; HB3 1,361; QD 1,583                                     |
| L61 | 125,5 | 9,175 | 4,588                | HB2 1,863; HB3 1,060; QD1 0,628; QD2 0,493; HG 0,857               |
| V62 | 111,3 | 8,831 | 4,851                | HB 2,382; QG1 0,887; QG2 0,621                                     |
| G63 | 107,5 | 7,535 | HA1 4,212; HA2 3,894 |                                                                    |
| A64 | 120,8 | 8,504 | 5,259                | QB 0,820                                                           |
| A65 | 121,0 | 8,589 | 4,628                | QB 1,217                                                           |
| T66 | 117,3 | 8,406 | 4,959                | HB 4,646; HG1 5,529; QG2 0,868                                     |
| P67 |       |       | 4,443                | HB2 2,296; HD2 3,873; HD3 3,701; QG 1,847                          |
| L68 | 116,9 | 7,557 | 4,092                | HB2 1,519; HB3 1,385; QD1 0,737; QD2 0,692; HG 1,475               |
| A69 | 118,8 | 7,416 | 4,852                | QB 0,874                                                           |
| T70 | 117,5 | 8,452 | 3,980                | HB 4,184; QG2 1,192                                                |
| S71 | 113,8 | 8,089 | 4,899                | HB2 3,713; HB3 3,430                                               |
| P72 |       |       | 5,235                | HB2 1,591; HB3 1,770; HD2 3,609; HD3 3,429; HG2 2,278; HG3 1,674   |
| M73 | 119,7 | 8,899 | 4,799                | HB2 1,761; HB3 2,119; HG2 2,229; HG3 2,415                         |
| L74 | 122,6 | 8,945 | 4,383                | HB2 1,819; HB3 0,780; QD1 0,640; QD2 0,467; HG 1,456               |
| M75 | 117,8 | 8,280 | 5,083                | HB2 1,630; HB3 0,659; HG2 2,248; HG3 2,088                         |
| T76 | 112,4 | 8,470 | 4,960                | HB 3,860; QG2 0,840                                                |
| T77 | 119,8 | 7,796 | 4,895                | HB 3,694; QG2 0,978                                                |
| T78 | 118,5 | 8,469 | 4,429                | HB 4,071; QG2 0,904                                                |
| H79 |       |       | 4,869                | HB2 3,087; HB3 2,830; HD2 6,958                                    |
| S80 | 117,0 | 8,115 | 4,513                | QB 3,709                                                           |
| G81 | 116,0 | 8,873 | HA1 3,693; HA2 3,834 |                                                                    |
| G82 | 107,8 | 8,411 | HA1 3,981; HA2 3,703 |                                                                    |
| M83 | 120,0 | 7,773 | 4,499                | QB 1,921; QG 2,411                                                 |

| Res  | N     | HN    | HA/HA1/HA2/QA        | Others                                                                                             |
|------|-------|-------|----------------------|----------------------------------------------------------------------------------------------------|
| A84  | 126,2 | 8,371 | 4,504                | QB 1,183                                                                                           |
| G85  | 109,5 | 8,046 | HA1 4,166; HA2 3,593 |                                                                                                    |
| M86  | 117,3 | 8,408 | 5,458                | HB2 2,436; HB3 1,968; HG2 2,626; HG3 2,722                                                         |
| K87  | 119,3 | 8,460 | 4,575                | QB 1,569; QD 1,103; QE 2,703; QG 1,302                                                             |
| M88  | 123,8 | 8,717 | 4,409                | HB2 2,030; HB3 1,852; HG2 2,649; HG3 2,425                                                         |
| V89  | 117,3 | 7,654 | 4,619                | HB 1,807; QG1 0,645; QG2 0,279                                                                     |
| P90  |       |       | 4,181                | HB2 1,910; HB3 1,535; QD 3,283; HG2 1,790; HG3 1,469                                               |
| W91  | 110,5 | 6,422 | 5,252                | HB2 3,457; HB3 2,773; HD1 6,743; NE1 130,3; HE1 10,040; HE3 7,207; HH2 7,086; HZ2 7,367; HZ3 7,002 |
| L92  | 117,3 | 8,441 | 4,683                | QB 1,320; QD1 0,640; QD2 0,480                                                                     |
| T93  | 119,3 | 8,864 | 5,009                | HB 3,832; QG2 0,788                                                                                |
| I94  | 127,2 | 9,570 | 4,519                | HB 1,781; QD1 0,666; HG12 1,331; HG13 1,552; QG2 0,866                                             |
| P95  |       |       | 4,093                | HB2 1,620; HB3 2,388; QD 3,252; QG 2,300                                                           |
| A96  | 124,7 | 8,484 | 3,465                | QB 0,887                                                                                           |
| R97  | 118,0 | 8,023 | 4,007                | HB2 1,867; HB3 1,773; QD 2,925; HG2 1,439; HG3 1,337                                               |
| G98  | 106,3 | 7,534 | HA1 3,429; HA2 4,659 |                                                                                                    |
| T99  | 112,3 | 8,222 | 5,385                | HB 3,673; QG2 0,951                                                                                |
| L100 | 127,0 | 9,180 | 4,723                | HB2 1,727; HB3 1,448; QD1 0,684; QD2 1,059; HG 1,293                                               |
| T101 | 126,0 | 9,057 | 4,471                | HB 3,905; QG2 0,964                                                                                |
| L102 | 129,3 | 9,112 | 5,008                | HB2 2,270; HB3 1,802; QD1 0,652; QD2 0,723; HG 1,503                                               |
| Q103 | 120,8 | 9,115 | 4,277                | HB2 1,803; HB3 1,911; NE2 111,8; HE21 6,717; HE22 7,377; QG 2,172                                  |
| R104 | 121,3 | 7,602 | 3,321                | QB 1,230; HD2 2,931; HD3 2,859; QG 1,154                                                           |
| D105 | 119,2 | 8,519 | 4,430                | HB2 2,612; HB3 2,767                                                                               |
| G106 | 107,5 | 7,629 | HA1 4,675; HA2 3,692 |                                                                                                    |
| D107 | 132,3 | 9,576 | 5,267                | HB2 2,569; HB3 2,641                                                                               |
| H108 | 112,5 | 8,928 | 4,809                | HB2 2,877; HB3 3,538; HD1 11,360; HD2 6,332; HE1 7,319; NE2 171,20; ND1 220,03                     |
| V109 | 118,0 | 7,465 | 4,164                | HB 1,744; QG1 0,452; QG2 0,590                                                                     |
| M110 | 129,8 | 9,682 | 5,017                | HB2 1,227; HB3 2,018; HG2 2,401; HG3 2,177                                                         |
| L111 | 130,5 | 9,369 | 3,951                | HB2 0,822; HB3 1,526; QD1 0,877; QD2 0,434; HG 1,215                                               |
| M112 | 119,8 | 6,121 | 4,919                | HB2 1,869; HB3 2,156; HG2 2,339; HG3 2,015                                                         |
| G113 | 114,7 | 8,846 | HA1 3,857; HA2 3,608 |                                                                                                    |

| Res  | N     | HN    | HA/HA1/HA2/QA        | Others                                                                     |
|------|-------|-------|----------------------|----------------------------------------------------------------------------|
| L114 | 123,5 | 9,405 | 4,357                | HB2 1,436; HB3 1,360; QD1 0,622                                            |
| K115 | 122,3 | 8,569 | 3,858                | HB2 1,870; HB3 1,377; QD 1,567; HE2 2,763; HE3 2,619; HG2 1,315; HG3 1,210 |
| R116 | 113,3 | 7,598 | 4,568                | QB 1,420; QD 2,920                                                         |
| P117 |       |       | 4,370                | HB2 2,192; HD2 3,611; HD3 3,425; QG 1,617                                  |
| L118 | 123,5 | 8,695 | 4,312                | HB2 1,627; HB3 1,198; QD1 0,670; QD2 0,595; HG 1,706                       |
| K119 | 125,0 | 9,554 | 4,394                | HB2 1,462; HB3 1,547; QG 1,236                                             |
| V120 | 124,0 | 8,449 | 3,115                | HB 1,809; QG1 0,854; QG2 0,832                                             |
| G121 | 115,8 | 8,874 | HA1 3,473; HA2 4,352 |                                                                            |
| E122 | 121,0 | 7,962 | 4,492                | HB2 1,780; HB3 2,281; QG 2,713                                             |
| T123 | 117,1 | 8,490 | 4,793                | HB 3,810; QG2 0,889                                                        |
| V124 | 128,3 | 9,293 | 3,973                | HB 1,674; QG1 0,634; QG2 0,558                                             |
| N125 | 125,2 | 8,481 | 5,327                | HB2 2,424; HB3 2,597; ND2 112,8; HD21 7,282; HD22 6,610                    |
| I126 | 127,8 | 9,411 | 4,391                | HB 1,388; QD1 0,346; QG2 0,528                                             |
| T127 | 124,5 | 9,305 | 5,045                | HB 3,789; QG2 1,015                                                        |
| L128 | 128,3 | 9,286 | 4,962                | HB2 1,656; HB3 1,229; QD1 0,705; QD2 0,636; HG 1,537                       |
| K129 | 120,7 | 8,123 | 4,767                | HB2 1,453; HB3 1,391; QG 1,001                                             |
| A130 | 126,0 | 8,559 | 5,498                | QB 1,453                                                                   |
| T131 | 112,2 | 8,201 | 3,838                | HB 4,061; QG2 1,165                                                        |
| D132 | 116,5 | 7,105 | 4,479                | HB2 3,008; HB3 2,441                                                       |
| G133 | 107,3 | 7,802 | HA1 4,255; HA2 3,397 |                                                                            |
| R134 | 120,3 | 7,708 | 4,382                | HB2 1,948; HB3 1,372; HD2 3,174; HD3 2,735; QG 1,480                       |
| T135 | 107,2 | 8,068 | 5,396                | HB 3,947; QG2 0,966                                                        |
| L136 | 120,3 | 8,535 | 4,678                | HB2 1,514; HB3 1,281; QD1 0,926; QD2 0,535                                 |
| N137 | 126,0 | 8,891 | 4,980                | HB2 2,528; HB3 2,680; ND2 112,8; HD21 7,391; HD22 6,710                    |
| V138 | 126,2 | 9,143 | 3,951                | HB 2,008; QG1 0,712; QG2 0,753                                             |
| A139 | 131,6 | 8,435 | 4,538                | QB 1,101                                                                   |
| A140 | 128,3 | 8,576 | 4,438                | QB 0,954                                                                   |
| T141 | 118,0 | 7,646 | 4,808                | HB 3,745; QG2 1,024                                                        |
| V142 | 128,0 | 8,661 | 4,646                | HB 2,259; QG1 0,568; QG2 0,788                                             |
| K143 | 129,6 | 8,759 | 4,680                | HB2 1,763; HB3 1,461; QD 1,599; QG 1,329                                   |

| <b>Res</b>  | <b>N</b> | <b>HN</b> | <b>HA/HA1/HA2/QA</b> | <b>Others</b>                                           |
|-------------|----------|-----------|----------------------|---------------------------------------------------------|
| <b>K144</b> | 124,2    | 8,806     | 4,229                | HB2 1,708; QD 1,566                                     |
| <b>N145</b> | 121,8    | 8,595     | 4,660                | HB2 2,706; HB3 2,639; ND2 113,3; HD21 7,578; HD22 6,896 |
| <b>I146</b> | 122,0    | 8,217     | 4,022                | HB 1,764; QD1 0,752; HG12 1,076; HG13 1,316; QG2 0,767  |
| <b>E147</b> | 124,5    | 8,424     | 4,146                | HB2 1,821; HB3 1,938; QG 2,129                          |
| <b>G148</b> | 110,0    | 8,232     | QA 3,796             |                                                         |
| <b>R149</b> | 125,5    | 7,695     | 4,050                | HB2 1,715; HB3 1,562; QD 3,033; QG 1,439                |
