# Supplementary material
Source: PubMed Central journal article supplement (PMC554794)
Supplement: pnas_102_11_3994__10.pdf [file pnas_102_11_3994__10.pdf]

**Table 5.** Statistical analysis of the energy minimized family of conformers and of the mean structure of apoDR1885

|                                                                                   | REM <sup>a</sup>       | <REM> <sup>a</sup> |
|-----------------------------------------------------------------------------------|------------------------|--------------------|
| <b>RMS violations per meaningful distance constraint (Å)<sup>b</sup></b>          |                        |                    |
| Intraresidue (225)                                                                | 0.0224 ± 0.0048        | 0.0234             |
| Sequential (588)                                                                  | 0.0143 ± 0.0040        | 0.0108             |
| Medium range (186) <sup>c</sup>                                                   | 0.0133 ± 0.0035        | 0.0157             |
| Long range (733)                                                                  | 0.0160 ± 0.0027        | 0.0097             |
| <b>Total (1732)</b>                                                               | <b>0.0165 ± 0.0005</b> | <b>0.0133</b>      |
| <b>RMS violations per meaningful dihedral angle constraints (deg)<sup>b</sup></b> |                        |                    |
| Phi (57)                                                                          | 2.03 ± 0.48            | 1.91               |
| Psi (60)                                                                          | 1.94 ± 1.67            | 1.20               |
| <b>Average number of violations per structure</b>                                 |                        |                    |
| Intraresidue                                                                      | 9.2 ± 2.6              | 7                  |
| Sequential                                                                        | 10.2 ± 3.5             | 9                  |
| Medium range                                                                      | 4.3 ± 1.6              | 4                  |
| Long range                                                                        | 21.9 ± 4.6             | 13                 |
| Total                                                                             | 45.6 ± 7.7             | 33                 |
| Phi                                                                               | 7.9 ± 1.8              | 10                 |
| Psi                                                                               | 3.6 ± 1.5              | 2                  |
| Average no. of NOE violations larger than 0.3 Å                                   | 0.1 ± 0.3              | 0                  |
| Average no. of NOE violations between 0.1 Å and 0.3 Å                             | 15.6 ± 4.8             | 7                  |

### Structural analysis<sup>d</sup>

|                                             |      |       |
|---------------------------------------------|------|-------|
| % of residues in most favorable regions     | 55.4 | 54.9  |
| % of residues in allowed regions            | 39.2 | 42.2  |
| % of residues in generously allowed regions | 3.9  | 2.9   |
| % of residues in disallowed regions         | 1.5  | 0.0   |
| H-bond energy (kJ mol <sup>-1</sup> )       | -    | 3.14  |
| Overall G-factor                            | -    | -0.40 |

---

<sup>a</sup>REM indicates the energy minimized family of 20 structures and <REM> is the energy minimized mean structure obtained from the coordinates of the individual REM structures.

<sup>b</sup>The number of meaningful constraints for each class is reported in parentheses.

<sup>c</sup>Medium range distance constraints are those between residues (i,i+2), (i,i+3), (i,i+4), and (i,i+5).

<sup>d</sup>As it results from the Ramachandran plot analysis. For the PROCHECK statistics, an average H-bond energy in the range of 2.5-4.0 kJ·mol<sup>-1</sup>, and an overall G-factor larger than -0.5 are expected for a good quality structure.
