# Supplementary material
Source: PubMed Central journal article supplement (PMC554794)
Supplement: pnas_102_11_3994__11.pdf [file pnas_102_11_3994__11.pdf]

**Table 6.** Statistical analysis of the energy minimized family of conformers and of the mean structure of Cu(I)DR1885

|                                                                                   | REM <sup>a</sup>       | <REM> <sup>a</sup> |
|-----------------------------------------------------------------------------------|------------------------|--------------------|
| <b>RMS violations per meaningful distance constraint (Å)<sup>b</sup></b>          |                        |                    |
| Intraresidue (306)                                                                | 0.0135 ± 0.0030        | 0.0119             |
| Sequential (788)                                                                  | 0.0120 ± 0.0014        | 0.0136             |
| Medium range (312) <sup>c</sup>                                                   | 0.0124 ± 0.0020        | 0.0126             |
| Long range (1200)                                                                 | 0.0108 ± 0.0013        | 0.0114             |
| <b>Total (2606)</b>                                                               | <b>0.0118 ± 0.0010</b> | <b>0.0123</b>      |
| <b>RMS violations per meaningful dihedral angle constraints (deg)<sup>b</sup></b> |                        |                    |
| Phi (60)                                                                          | 2.02 ± 0.37            | 2.42               |
| Psi (60)                                                                          | 1.62 ± 0.41            | 1.53               |
| <b>Average number of violations per structure</b>                                 |                        |                    |
| Intraresidue                                                                      | 6.5 ± 2.0              | 6                  |
| Sequential                                                                        | 12.8 ± 2.5             | 13                 |
| Medium range                                                                      | 6.9 ± 1.9              | 7                  |
| Long range                                                                        | 18.1 ± 3.1             | 20                 |
| Total                                                                             | 44.2 ± 5.1             | 46                 |
| Phi                                                                               | 8.6 ± 1.8              | 11                 |
| Psi                                                                               | 3.8 ± 1.5              | 3                  |
| Average no. of NOE violations larger than 0.3 Å                                   | 0.0 ± 0.0              | 0                  |
| Average no. of NOE violations between 0.1 Å and 0.3 Å                             | 10.1 ± 3.0             | 9                  |

### Structural analysis<sup>d</sup>

|                                             |      |       |
|---------------------------------------------|------|-------|
| % of residues in most favorable regions     | 59.7 | 60.6  |
| % of residues in allowed regions            | 35.0 | 35.4  |
| % of residues in generously allowed regions | 3.6  | 4.0   |
| % of residues in disallowed regions         | 1.8  | 0.0   |
| H-bond energy (kJ mol <sup>-1</sup> )       | -    | 3.10  |
| Overall G-factor                            | -    | -0.41 |

---

<sup>a</sup>REM indicates the energy minimized family of 20 structures and <REM> is the energy minimized mean structure obtained from the coordinates of the individual REM structures.

<sup>b</sup>The number of meaningful constraints for each class is reported in parentheses.

<sup>c</sup>Medium range distance constraints are those between residues (i,i+2), (i,i+3), (i,i+4), and (i,i+5).

<sup>d</sup>As it results from the Ramachandran plot analysis. For the PROCHECK statistics, an average H-bond energy in the range of 2.5-4.0 kJ·mol<sup>-1</sup>, and an overall G-factor larger than -0.5 are expected for a good quality structure.
