# Supplementary material
Source: PubMed Central journal article supplement (PMC554794)

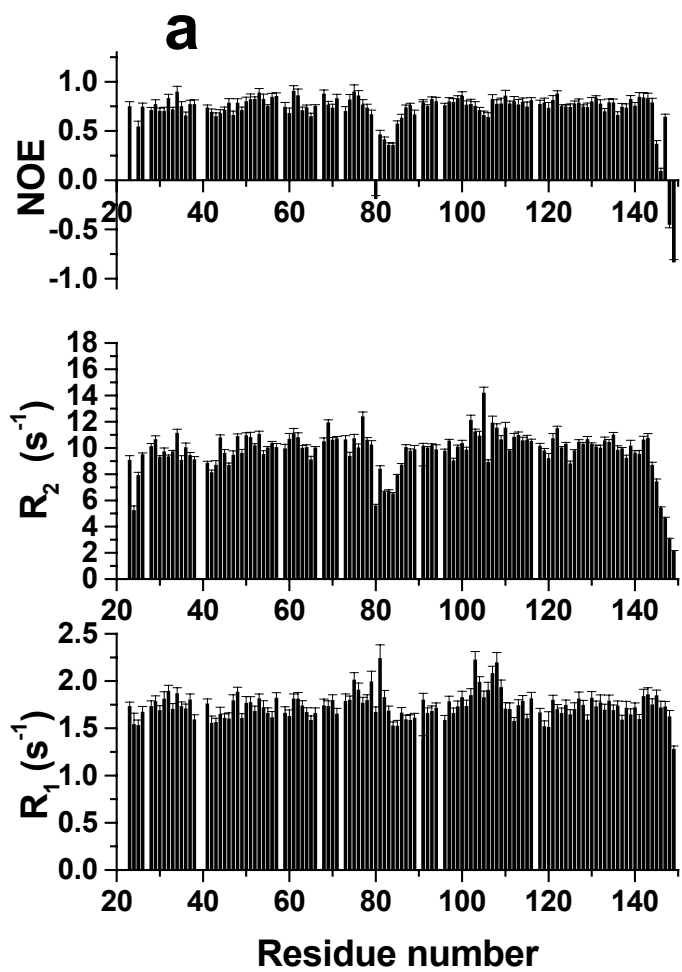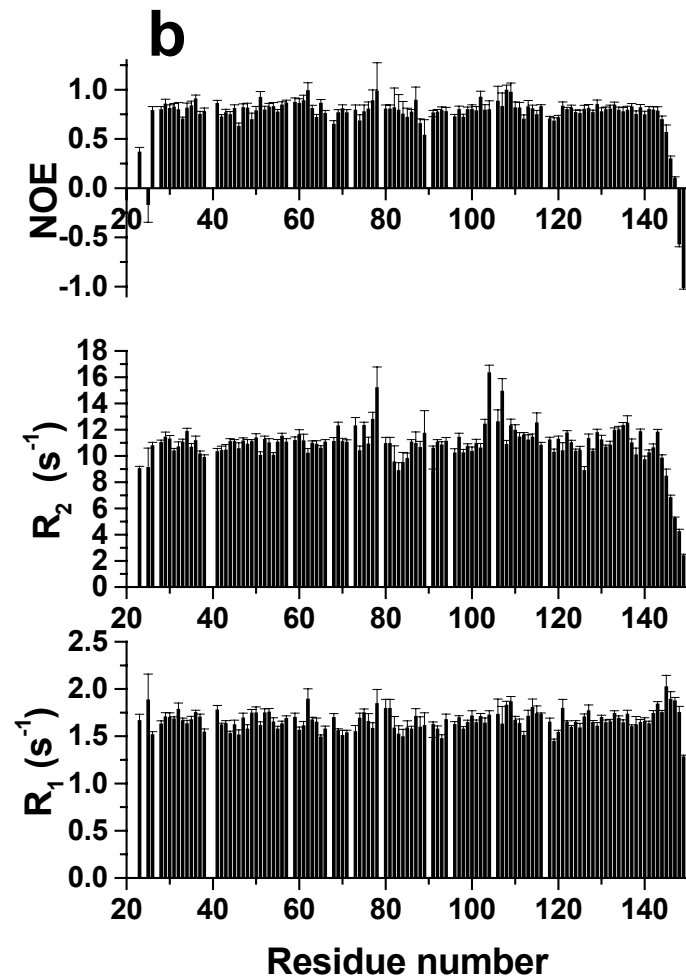

Supplement: pnas_102_11_3994__12.pdf [file pnas_102_11_3994__12.pdf]

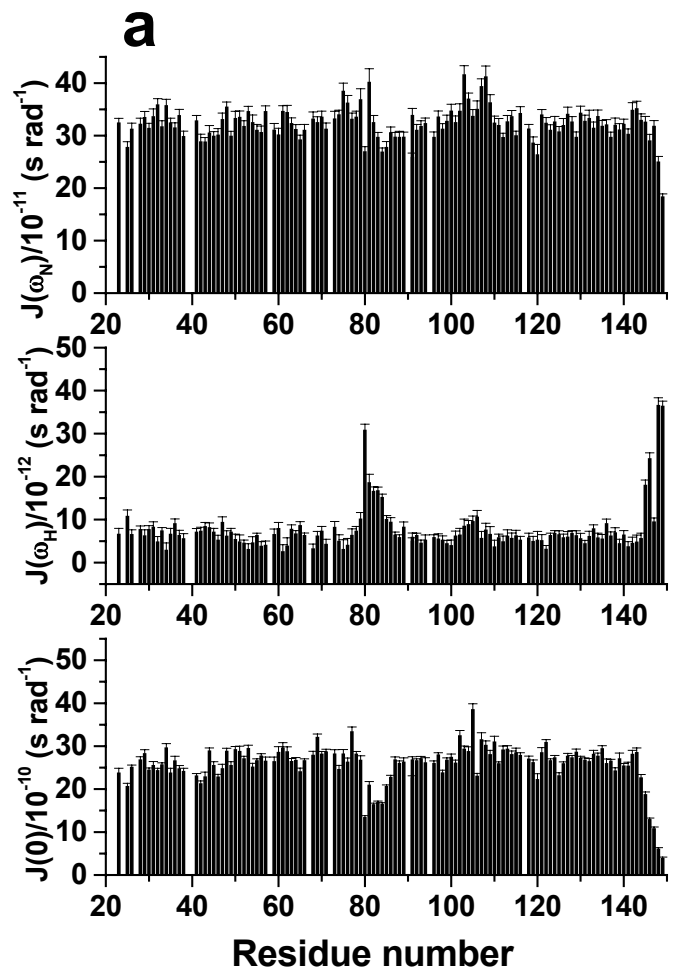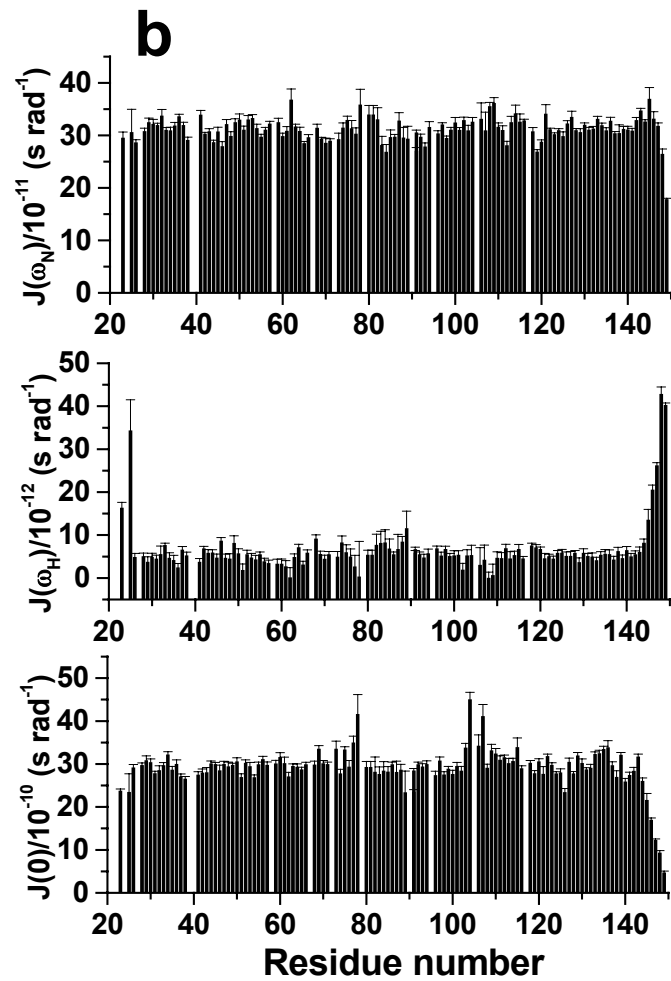

Supplement: pnas_102_11_3994__13.pdf [file pnas_102_11_3994__13.pdf]

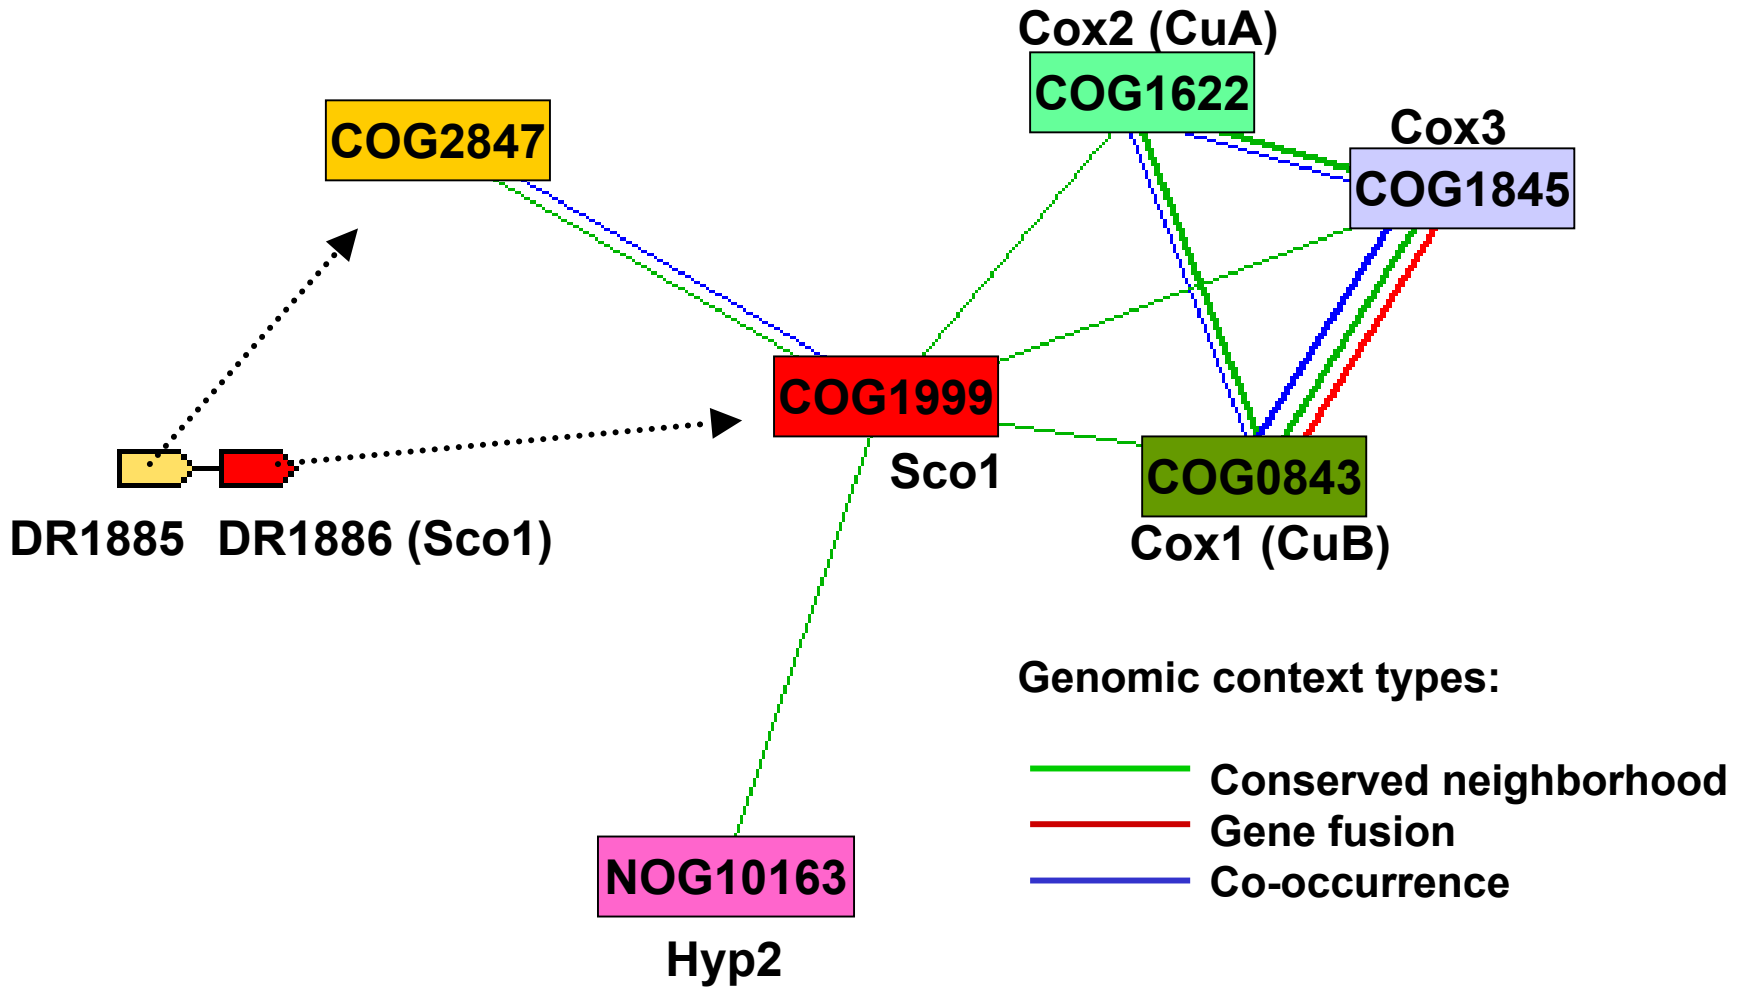

Supplement: pnas_102_11_3994__3.pdf [file pnas_102_11_3994__3.pdf]

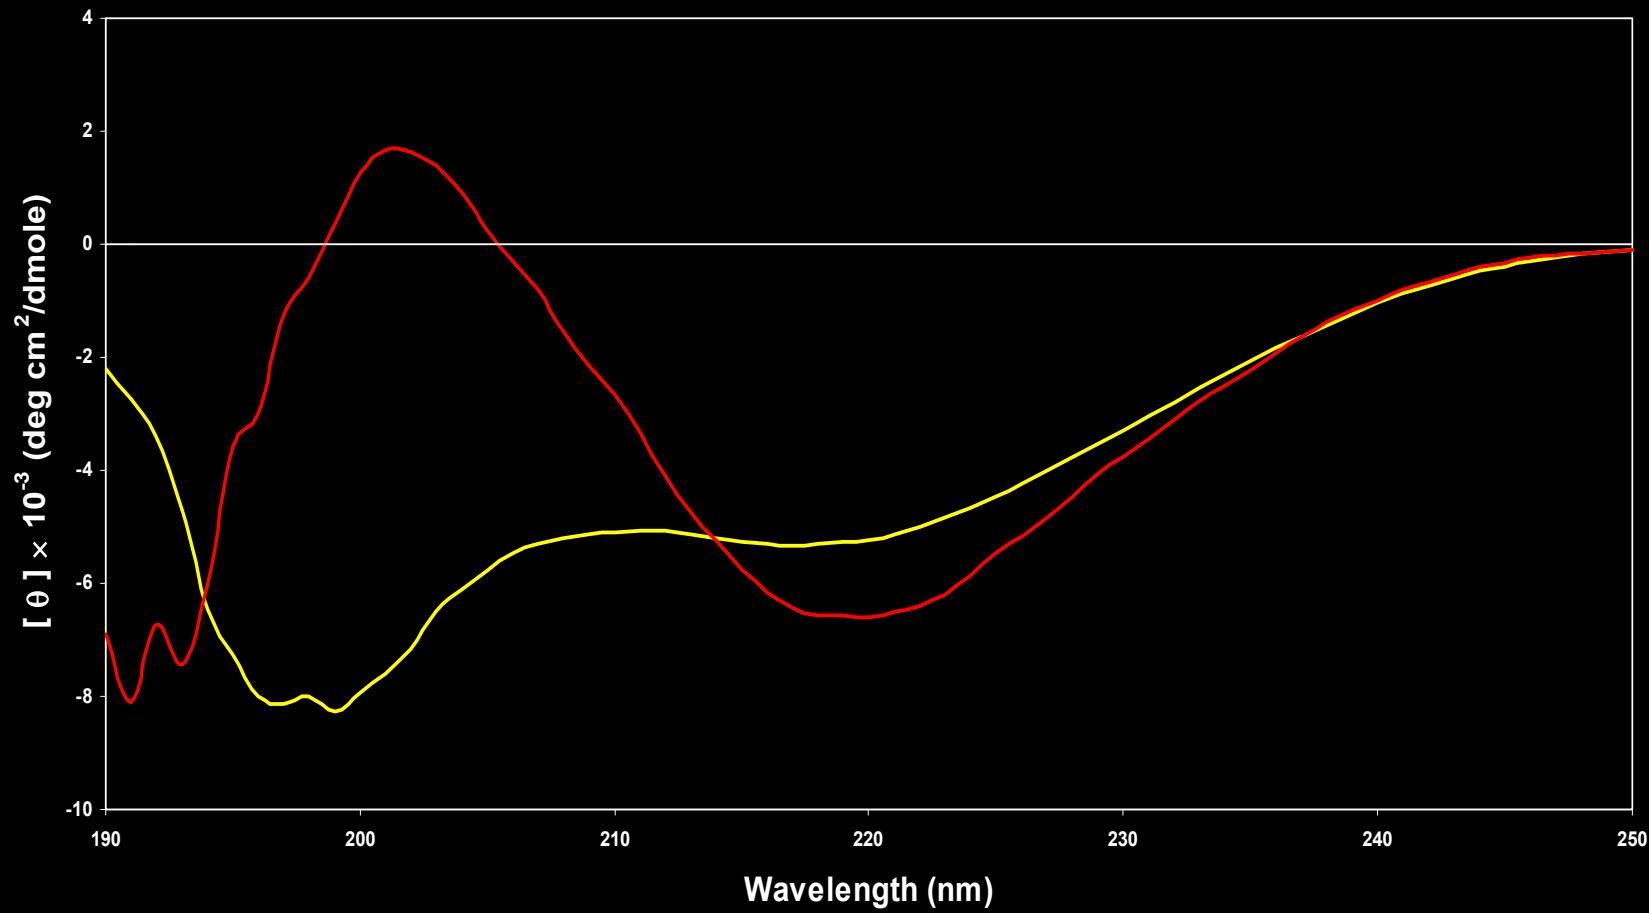

Supplement: pnas_102_11_3994__4.pdf [file pnas_102_11_3994__4.pdf]

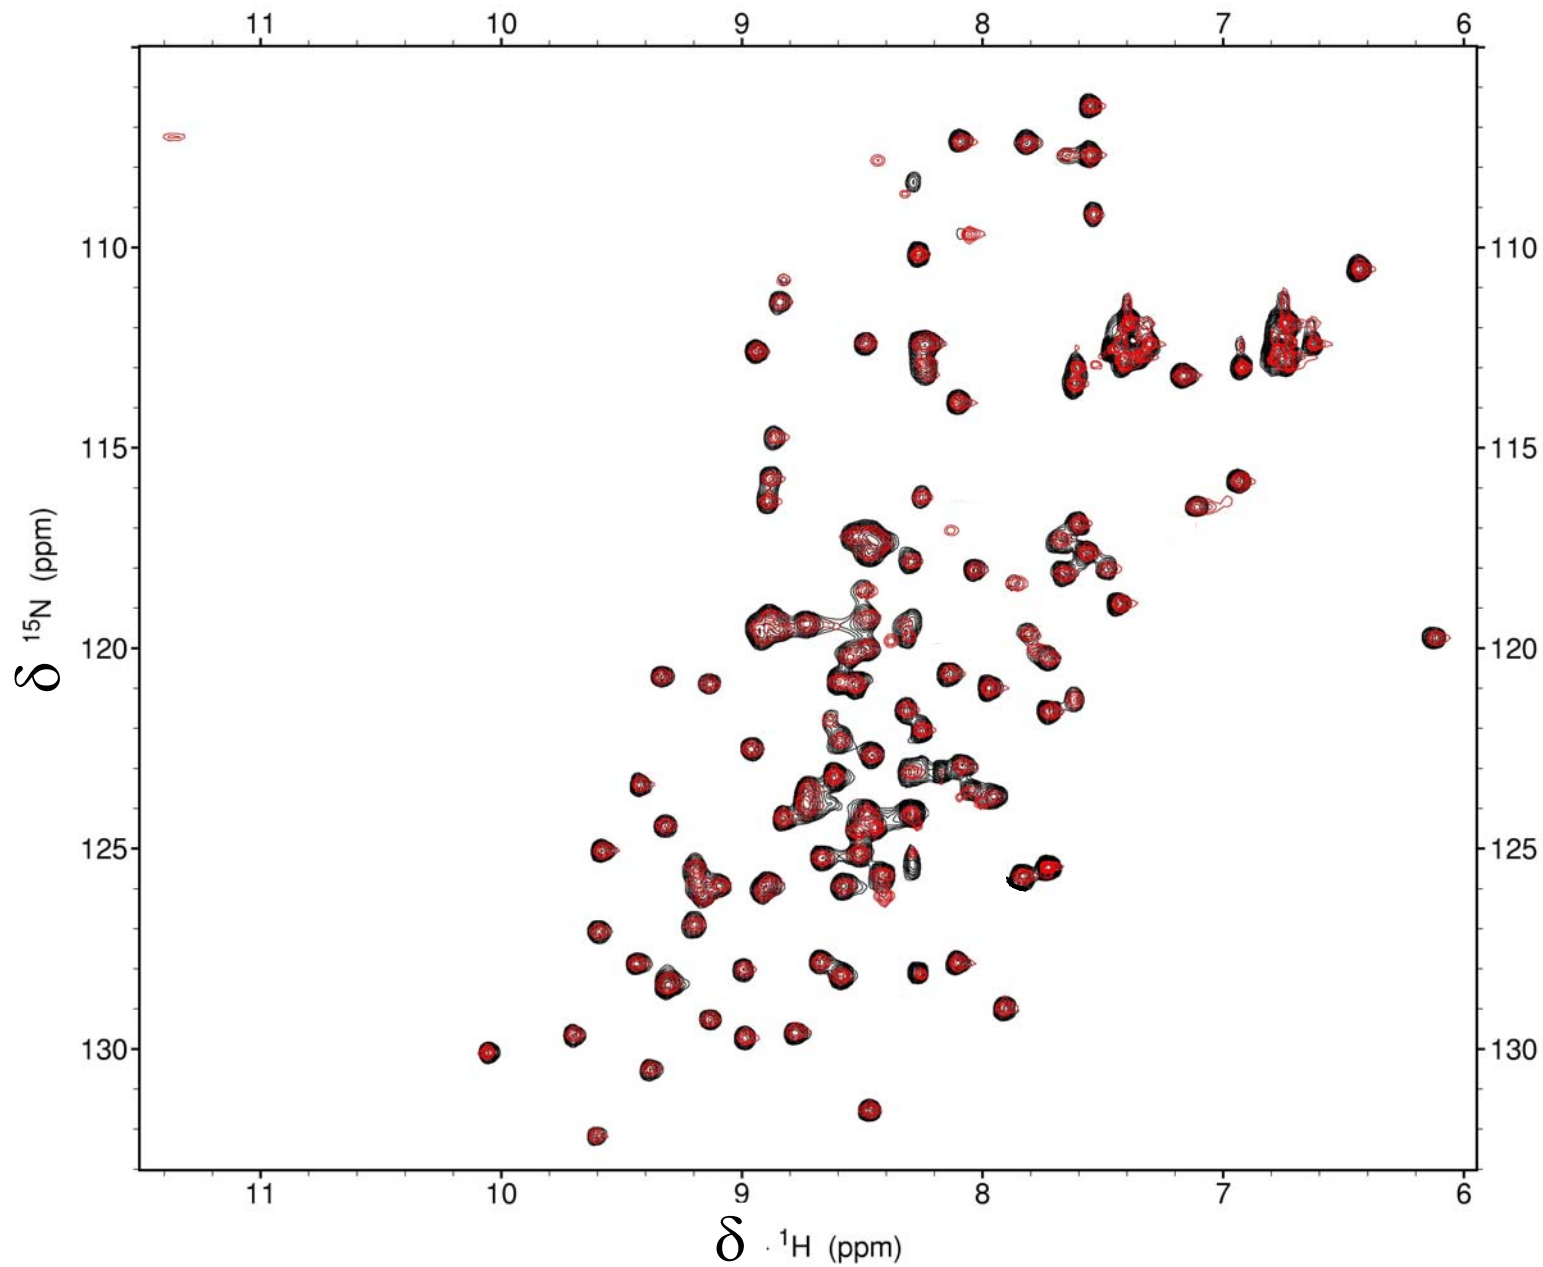

Supplement: pnas_102_11_3994__5.pdf [file pnas_102_11_3994__5.pdf]

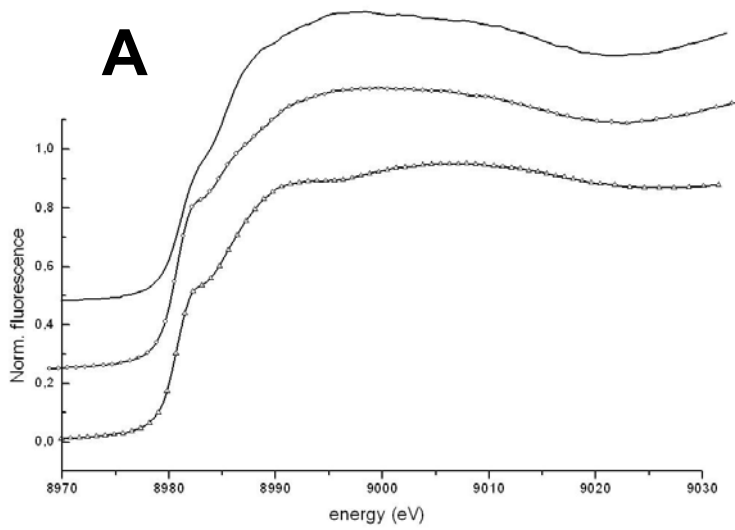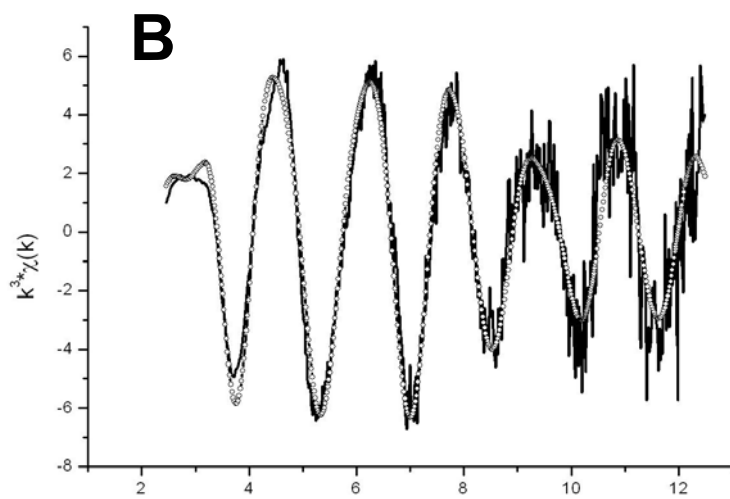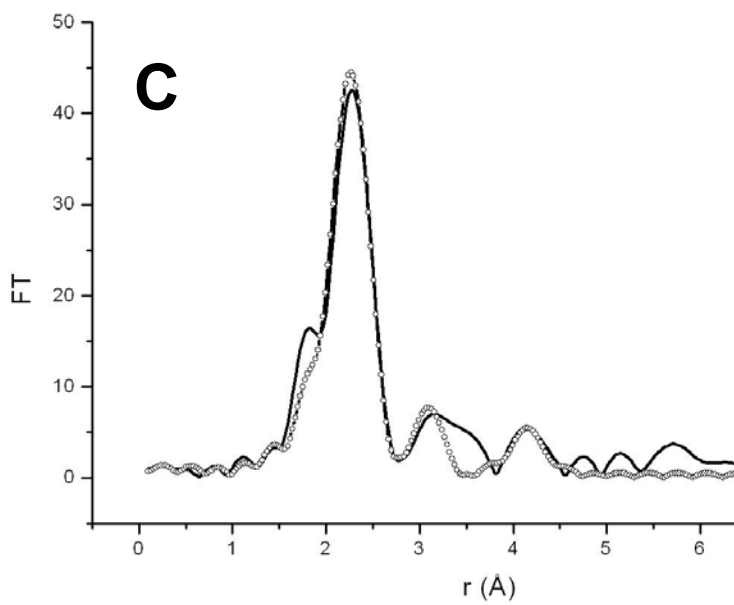

Supplement: pnas_102_11_3994__6.pdf [file pnas_102_11_3994__6.pdf]
